# Supplementary material for: Improved MECP2 Gene Therapy Extends the Survival of MeCP2-Null Mice without Apparent Toxicity after Intracisternal Delivery
Source: PubMed Central journal article supplement — Mol Ther Methods Clin Dev. 2017 Apr 19;5:106–15. doi: 10.1016/j.omtm.2017.04.006 (PMC5424572; doi:10.1016/j.omtm.2017.04.006), 2017-04-19
Supplement: mmc1.pdf [file mmc1.pdf]

OMTM, Volume 5

## Supplemental Information

### Improved *MECP2* Gene Therapy Extends the Survival of MeCP2-Null Mice without Apparent Toxicity after Intracisternal Delivery

Sarah E. Sinnett, Ralph D. Hector, Kamal K.E. Gadalla, Clifford Heindel, Daphne Chen, Violeta Zaric, Mark E.S. Bailey, Stuart R. Cobb, and Steven J. Gray

**Improved *MECP2* gene therapy extends the survival of MeCP2-null mice without apparent toxicity after intracisternal delivery**

Sarah E. Sinnett<sup>1,2</sup>, Ralph D. Hector<sup>3</sup>, Kamal K.E. Gadalla<sup>3,4</sup>, Clifford Heindel<sup>1</sup>, Daphne Chen<sup>1</sup>, Violeta Zaric<sup>1</sup>, Mark E. S. Bailey<sup>5</sup>, Stuart R. Cobb<sup>3</sup>, Steven J. Gray<sup>1,2,6</sup>

<sup>1</sup>University of North Carolina (UNC) Gene Therapy Center, Chapel Hill, NC, USA; <sup>2</sup>Carolina Institute for Developmental Disabilities, Chapel Hill, NC, USA; <sup>3</sup>Institute of Neuroscience and Psychology, University of Glasgow; <sup>4</sup>Pharmacology Dept, Faculty of Medicine, Tanta University, Egypt; <sup>5</sup>School of Life Sciences, College of Medical, Veterinary and Life Sciences, University of Glasgow; <sup>6</sup>UNC Dept of Ophthalmology, Chapel Hill, NC, USA.

## Supplemental Results

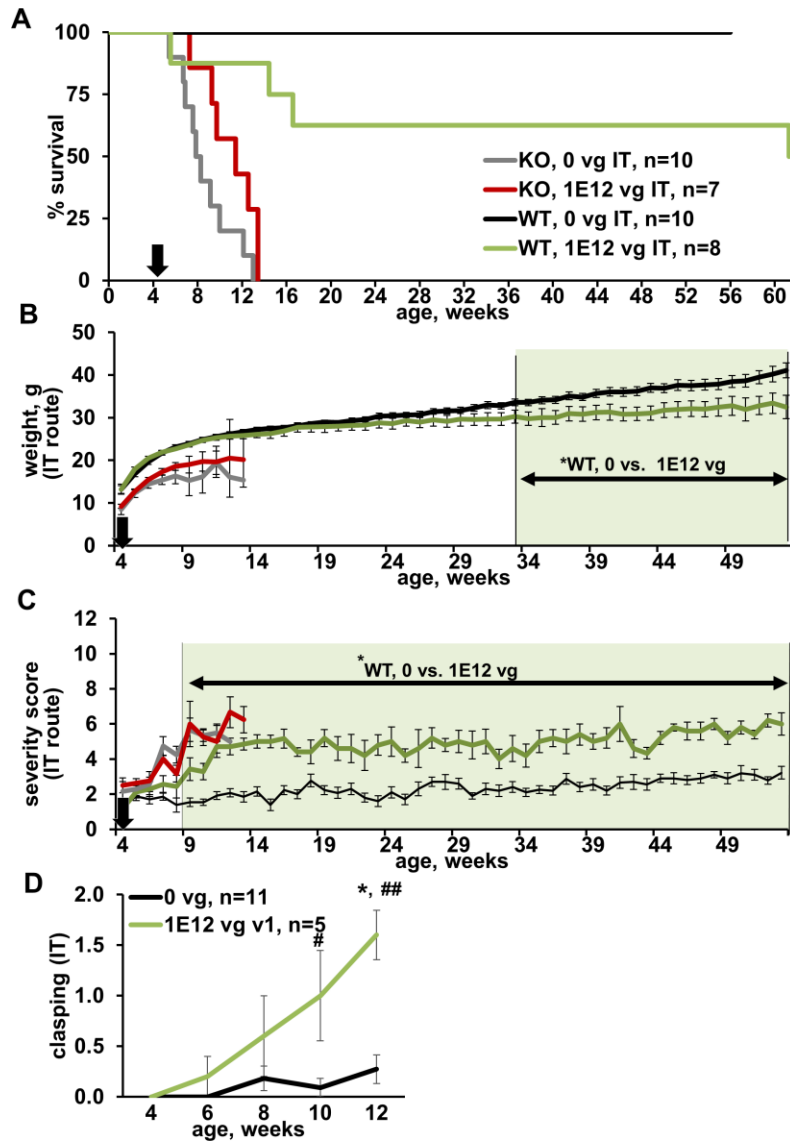

**Fig. S1, related to Figs. 1 and 3: Percutaneous IT delivery of AAV9/hMECP2(v1) induces significant and persistent increases in phenotype severity scores for treated WT mice.** Compare to **Figs. 1 and 3**, which present a parallel data set for ICM delivery of AAV9/hMECP2(v1). **(A)** Survival curves for saline- and virus-treated *Mecp2*<sup>-/-</sup> and WT mice. We did not observe a significant extension in survival for virus-treated *Mecp2*<sup>-/-</sup> mice injected intrathecally ( $p = 0.06$ ). However, the lack of significance may be due to low power, as the median survivals of *Mecp2*<sup>-/-</sup> mice injected IT or ICM with  $1 \times 10^{12}$  vg AAV9/hMECP2(v1) are similar (80 and 84 days, respectively). **(B)** The shaded area indicates ages at which virus-treated WT mice had a significantly lower mean body weight compared to that of saline-treated WT mice ( $p \leq 0.05$ ). **(C)** The shaded area indicates ages at which virus-treated WT mice had significantly higher aggregate phenotype severity scores compared to those of saline-treated WT mice ( $p \leq 0.05$ ). **(D)** A significant increase in severity scores for hindlimb clasping contributed to the overall increase in aggregate severity score. For limb clasping, \* $p = 0.003$  (4 vs. 12 weeks of age for virus-treated mice, pair-wise t-test); ## $p = 0.0002$  at 12 weeks of age; # $p = 0.01$  at 10 weeks of age, saline- vs. virus-treated mice. **(B-D)** Data points are mean  $\pm$  SEM.

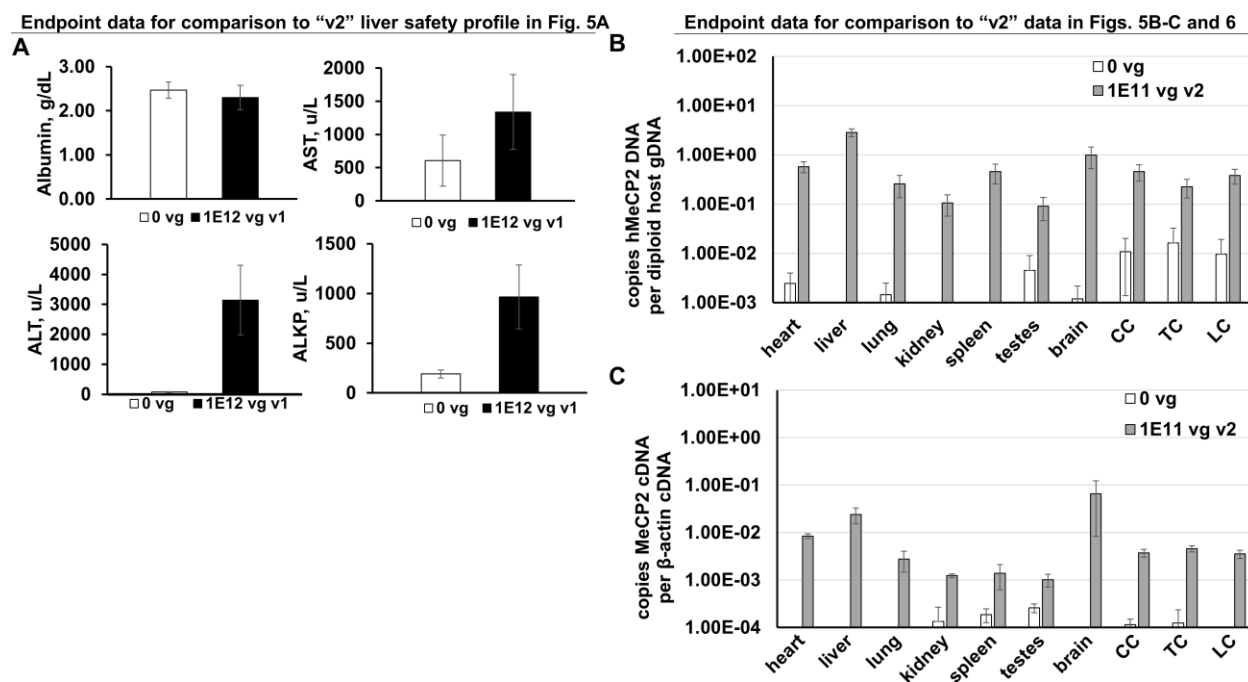

**Fig. S2. Supplemental endpoint data for comparison to Figs. 5-6.** (A) Blood serum levels of liver toxicity indicators after treatment with  $1 \times 10^{12}$  vg AAV9/*hMECP2*(v1) (ICM).  $p = 0.7$  for albumin;  $p = 0.1$  for ALT;  $p = 0.4$  for AST;  $p = 0.1$  for ALKP. The y-axis is plotted on the same scale as that shown in **Figs. 5A**. Data for  $1 \times 10^{12}$  vg AAV9/*hMECP2*(v1) can be compared to that of  $1 \times 10^{12}$  AAV9/*hMECP2*(v2), which is shown in **Fig. 5A**. (B-C) Biodistribution and gene expression data used to calculate normalized gene expression in mice treated with  $1 \times 10^{11}$  vg AAV9/*hMECP2*(v2) (see **Fig. 6**). Tissue samples for **Figs. 2** and **S2B-C** were processed in parallel. Therefore, the same saline control data appears in **Figs. 2** and **S2B-C**. (B) As expected, viral genome copies are about 10-fold less than those of observed for mice treated with  $1 \times 10^{12}$  vg AAV9/*hMECP2*(v2) (see **Fig. 5B**). (A-C)  $n = 3$  saline-treated mice and 5 virus-treated *Mecp2*<sup>-/-</sup> mice. Data are mean  $\pm$  SEM. CC, cervical spinal cord; g/dL, grams/deciliter; LC, lumbar spinal cord; TC, thoracic spinal cord; u/L, units/liter.

### **MeP426 promoter**

ATAGGCGCCAAGAGCCTAGACTTCCTTAAGCGCCAGAGTCCACAAGGGGCCAGTT  
AATCCTCAACATTCAAATGCTGCCACAAAACCAGCCCCTCTGTGCCCTAGCCGC  
CTCTTTTTTCCAAGTGACAGTAGAACTCCACCAATCCGCAGCTGAATGGGGTCCG  
CCTCTTTTCCCTGCCTAAACAGACAGGAACTCCTGCCAATTGAGGGCGTCACCGC  
TAAGGCTCCGCCCCAGCCTGGGCTCCACAACCAATGAAGGGTAATCTCGACAAAG  
AGCAAGGGGTGGGGCGCGGGCGCGCAGGTGCAGCAGCACACAGGCTGGTCGG  
GAGGGCGGGGCGCGACGTCTGCCGTGCGGGGTCCCGGCATCGGTTGCGCGCG  
CGCTCCCTCCTCTCGGAGAGAGGGCTGTGGTAAAACCCGTCCGGAAA

### **RDH1pA**

AGCTCGCTGATCAGCCTCACAAGAATAAAGGCAGCTGTTGTCTCTTCAGAAGTAG  
CTTTGCACTTTTCTAAACTAGGAATATCACCAGGACTGTTACTCAATGTGTGCTGCA  
GGAAAGCACTGATATATTTAAAAACAAAAGGTGTAACCTATTTATTATATAAAGAGTTT  
GCCTTATAAATTTACATAAAAATGTCCGTTTGTGTCTTTTGTGTAAAATC

**Fig. S3. Sequences of MeP426 and RDH1pA, related to Methods**

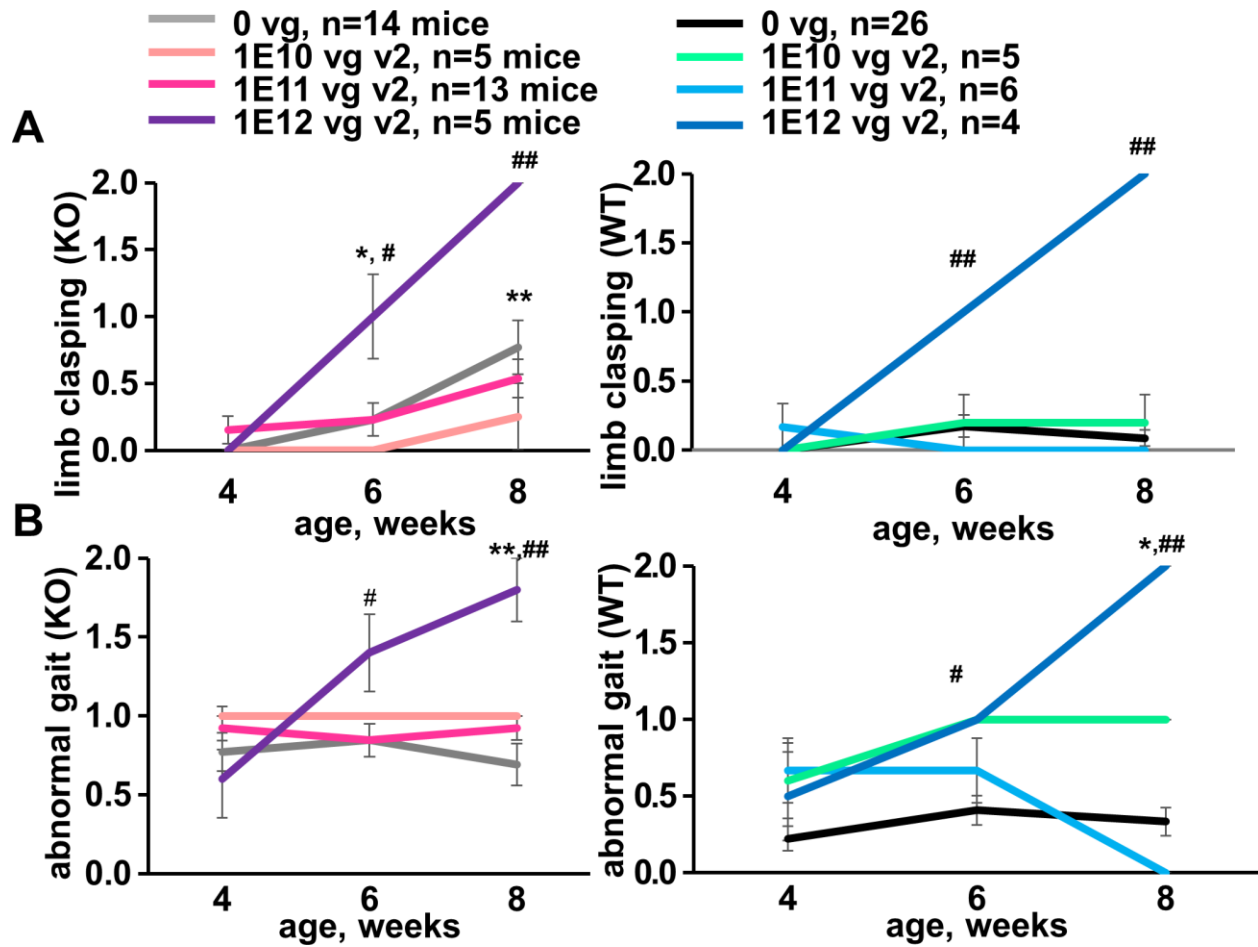

Fig. S4, related to Fig. 4.  $1 \times 10^{12}$  vg AAV9/*hMECP2*(v2) significantly increases clasping and abnormal gait scores in *Mecp2*<sup>-/-</sup> (left) and WT mice (right) after ICM injection at 4-5 weeks old. Compare to Fig. 4D for aggregate phenotype severity scores. Pair-wise analyses (pre- vs. post-ICM): \* $p \leq 0.03$ ; \*\* $p \leq 0.004$ . Unpaired analyses (saline vs. virus treatment): # $p \leq 0.02$ ; ## $p \leq 0.002$ . For clarity, unpaired p values are listed only for comparisons between saline and  $1 \times 10^{12}$  vg AAV9/*hMECP2*(v2)-treated mice; paired p values are listed for only saline and  $1 \times 10^{12}$  vg AAV9/*hMECP2*(v2)-treated mice. Data for saline-treated *Mecp2*<sup>-/-</sup> mice also appears in Fig. 1F-G. Data for saline-treated WT mice also appears in Fig. 3D-E. (A-B) Data points are mean  $\pm$  SEM.

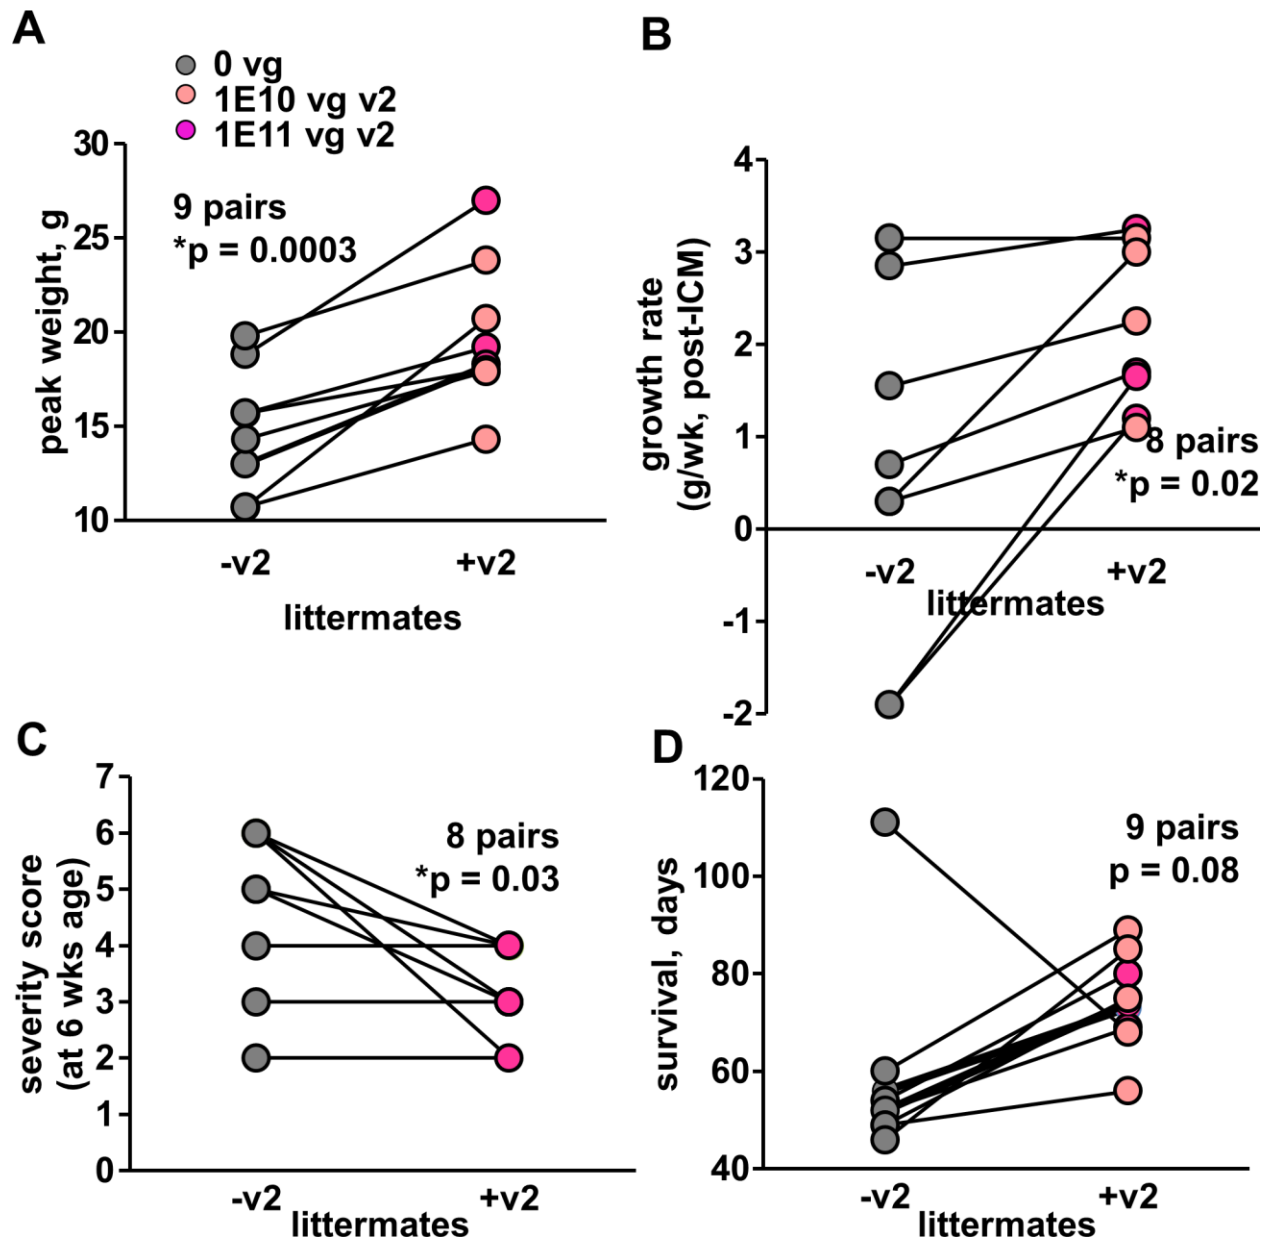

**Fig. S5. Paired littermate analyses, related to Fig. 4.** Note: Mean data for cohorts is presented in Fig. 4. For paired littermate analyses, vehicle and virus treatments were randomly assigned without any prior knowledge regarding each sibling's body weight or general physical condition. **(A)** AAV9/*hMECP2*(v2)-treated *Mecp2*<sup>-y</sup> mice obtain greater peak body weights during their lifetime than their saline-treated littermates. **(A-D)** Each line connects a pair of littermates. **(B)** Compared to saline-treated littermates, AAV9/*hMECP2*(v2)-treated *Mecp2*<sup>-y</sup> mice grow at a faster rate immediately after treatment (data shown for 5-7 weeks of age). **(C)** AAV9/*hMECP2*(v2) delays the deterioration in overall health shortly after treatment. Aggregate severity scores are shown for mice at 6 weeks of age. **(B-C)** One littermate pair was excluded from data analyses because the saline-treated littermate died prior to data collection at approximately 6 weeks of age. **(D)** Most *Mecp2*<sup>-y</sup> mice treated with 1 x 10<sup>10</sup> – 1 x 10<sup>11</sup> vg AAV9/*hMECP2*(v2) live longer than their saline-treated *Mecp2*<sup>-y</sup> littermates. In 8 of 9 pairs, the virus-treated mice outsurvived their vehicle-treated littermates.

**Video S1 for Fig. 3. Representative WT mice treated with saline, 1E12 vg AAV9/hMECP2(v1), or 1 x 10<sup>12</sup> vg AAV9/EGFP.** WT mice were injected ICM between 4-5 weeks of age. At 6 months age, the saline-treated mouse in this video appears alert and has good mobility and gait. At 6 months age, the AAV9/hMECP2(v1)-treated mouse in this video appears alert but has difficulty using his hind legs correctly. At 6 months age the AAV9/EGFP-treated mouse has normal mobility and gait. The absence of hindlimb clasping in the AAV9/EGFP-treated mouse was photographed at this age and is featured at the end of the video.

**Video S2 for Fig. 4. *Mecp2*<sup>-y</sup> littermates treated with saline or 1 x 10<sup>11</sup> vg AAV9/hMECP2(v2).** Both littermates were injected on PND30 and were video-recorded on PND52. The saline-treated mouse has poor mobility and shows little spontaneous movement during the duration of the video. The virus-treated sibling exhibits more spontaneous movement than his saline-treated *Mecp2*<sup>-y</sup> littermate. Note that the virus-treated littermate approaches the camera. This behavior could be an indicator of improved sociability.

**Video S3 for Fig. 4. Second pair of video-recorded *Mecp2*<sup>-y</sup> littermates treated with saline or 1 x 10<sup>11</sup> vg AAV9/hMECP2(v2).** These siblings were injected on PND31 and video-recorded on PND51. The saline-treated mouse walks slowly and explores in response to prompting. Note that he does not explore the camera. His virus-treated *Mecp2*<sup>-y</sup> littermate walks, climbs, explores, and approaches camera without prompting.

**Video S4 for Fig. 4. Third pair of video-recorded *Mecp2*<sup>-y</sup> littermates treated with saline or 1 x 10<sup>10</sup> vg AAV9/hMECP2(v2).** These siblings were injected on PND28 and video-recorded on PND40. The saline-treated mouse immediately walks to his hut. The reason for this behavior (*i.e.*, aversion to light or aversion to open spaces) is unclear. His virus-treated *Mecp2*<sup>-y</sup> littermate is more active.
